# Supplementary material
Source: PubMed Central journal article supplement (PMC3927987)
Supplement: NIHMS526980-supplement-Supplementary_Data.pdf [file NIHMS526980-supplement-Supplementary_Data.pdf]

## Supplementary Online Content

Reichborn-Kjennerud T, Ystrom E, Neale MC, et al. Structure of genetic and environmental risk factors for symptoms of DSM-IV borderline personality disorder. *JAMA Psychiatry*. Published online September 18, 2013. doi:10.1001/jamapsychiatry.2013.1944.

### **eTable 1. Polychoric Correlations Between *DSM-IV* Criteria for Borderline Personality Disorder**

### **eTable 2. Model Fitting Results**

This supplementary material has been provided by the authors to give readers additional information about their work.

**eTable 1. Polychoric Correlations Between *DSM-IV* Criteria for Borderline Personality Disorder**

| <b>Criterion</b>            | <b>1</b> | <b>2</b> | <b>3</b> | <b>4</b> | <b>5</b> | <b>6</b> | <b>7</b> | <b>8</b> | <b>9</b> |
|-----------------------------|----------|----------|----------|----------|----------|----------|----------|----------|----------|
| 1. Avoidance of abandonment | 1.00     |          |          |          |          |          |          |          |          |
| 2. Unstable relationships   | .56      | 1.00     |          |          |          |          |          |          |          |
| 3. Identity disturbance     | .41      | .46      | 1.00     |          |          |          |          |          |          |
| 4. Impulsive self-harm      | .30      | .36      | .32      | 1.00     |          |          |          |          |          |
| 5. Suicidal behavior        | .50      | .41      | .51      | .47      | 1.00     |          |          |          |          |
| 6. Affective instability    | .43      | .60      | .57      | .29      | .47      | 1.00     |          |          |          |
| 7. Feeling of emptiness     | .36      | .48      | .57      | .24      | .46      | .56      | 1.00     |          |          |
| 8. Intense anger            | .34      | .48      | .33      | .27      | .45      | .57      | .39      | 1.00     |          |
| 9. Paranoid ideation        | .46      | .44      | .54      | .39      | .47      | .50      | .44      | .43      | 1.00     |

**eTable 2. Model Fitting Results**

| Models                        |        | Common factors* | Item-specific factors | $\Delta\chi^2$ | $\Delta df$ | AIC    |
|-------------------------------|--------|-----------------|-----------------------|----------------|-------------|--------|
| <i>Cholesky</i>               |        |                 |                       |                |             |        |
| 1.                            | ACE**  |                 |                       |                |             |        |
| 2.                            | AE     |                 |                       | 5.8            | 45          | -84.2  |
| 3.                            | CE     |                 |                       | 17.3           | 45          | -72.7  |
| <i>AE independent pathway</i> |        |                 |                       |                |             |        |
| 4.                            | Step 0 | 4A - 4E         | $a_s - e_s$           | 16.3           | 45          | -73.7  |
| 5.                            | Step 1 | 3A - 4E         | $a_s - e_s$           | 23.4           | 54          | -84.6  |
| 6.                            |        | 4A - 3E         | $a_s - e_s$           | 22.3           | 54          | -85.7  |
| 7.                            | Step 2 | 3A - 3E         | $a_s - e_s$           | 28.2           | 63          | -97.8  |
| 8.                            |        | 4A - 2E         | $a_s - e_s$           | 41.0           | 63          | -85.0  |
| 9.                            | Step 3 | 2A - 3E         | $a_s - e_s$           | 39.8           | 72          | -104.2 |
| 10.                           |        | 3A - 2E         | $a_s - e_s$           | 45.5           | 72          | -98.5  |
| 11.                           | Step 4 | 1A - 3E         | $a_s - e_s$           | 49.7           | 81          | -112.3 |
| 12.                           |        | 2A - 2E         | $a_s - e_s$           | 57.3           | 81          | -104.7 |
| 13.                           | Step 5 | 0A - 3E         | $a_s - e_s$           | 135.6          | 90          | -44.4  |
| 14.                           |        | 1A - 2E         | $a_s - e_s$           | 76.2           | 90          | -103.8 |
| 15.                           | Step 6 | 1A - 3E         | $e_s$                 | 92.4           | 90          | -87.6  |
| <i>AE common pathway</i>      |        |                 |                       |                |             |        |
| 16.                           |        | 1               | $a_s - e_s$           | 141.8          | 107         | -72.2  |
| 17.                           |        | 2               | $a_s - e_s$           | 82.8           | 97          | -111.2 |
| 18.                           |        | 3               | $a_s - e_s$           | 53.6           | 87          | -120.4 |
| 19.                           |        | 4               | $a_s - e_s$           | 39.1           | 77          | -114.9 |
| 20.                           |        | 3               | $e_s$                 | 82.8           | 96          | -109.2 |

\* A indicates additive genetic factors, E indicates unique environmental factors

\*\*Fit statistics:  $-2ll = 17481.7$ ;  $df = 25000$ ;

$a_s$  indicates item-specific genetic factors

$e_s$  indicates item-specific unique environmental factors

AIC indicates Akaike's Information Criterion
